# Supplementary material
Source: PubMed Central journal article supplement (PMC4174929)
Supplement: 4e6fb6c47c228280f2011b887da33b65_genetics.114.162982-4.pdf [file 4e6fb6c47c228280f2011b887da33b65_genetics.114.162982-4.pdf]

cRNA PCR on *Tpcn2*

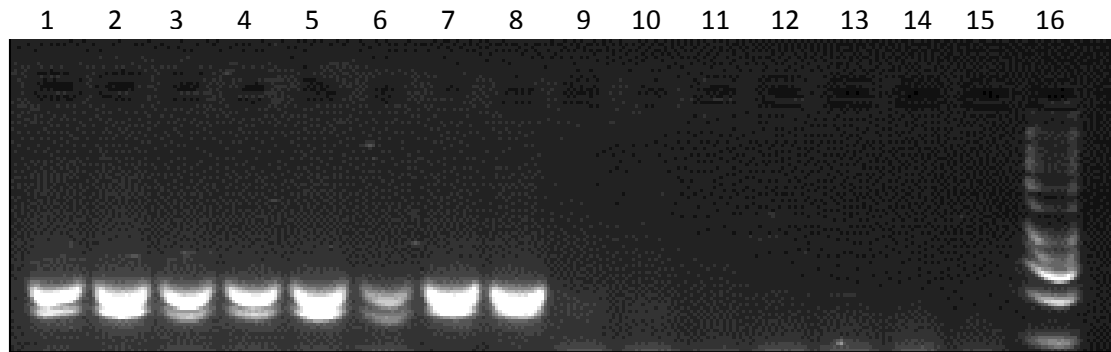

cRNA PCR on GAPDH

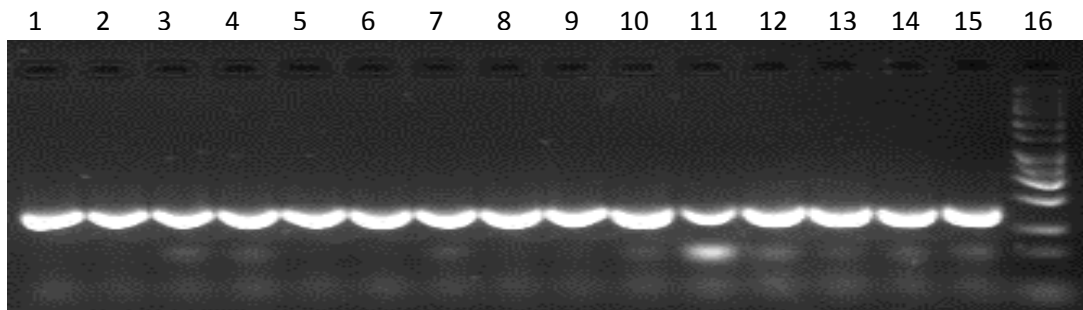

| Lane | Genotype      | Tissue cRNA is from |
|------|---------------|---------------------|
| 1    | Wild Type     | Kidney              |
| 2    | Wild Type     | Kidney              |
| 3    | Wild Type     | Retroperitoneal Fat |
| 4    | Wild Type     | Retroperitoneal Fat |
| 5    | Wild Type     | Heart               |
| 6    | Wild Type     | Heart               |
| 7    | Wild Type     | Liver               |
| 8    | Wild Type     | Liver               |
| 9    | Knockout      | Kidney              |
| 10   | Knockout      | Kidney              |
| 11   | Knockout      | Retroperitoneal Fat |
| 12   | Knockout      | Heart               |
| 13   | Knockout      | Heart               |
| 14   | Knockout      | Liver               |
| 15   | Knockout      | Liver               |
| 16   | Size Standard |                     |

**Figure S1** PCR on RNA from multiple tissues in wild-type and knock-out *Tpcn2* mice. Results confirm that the knock-out mice do not transcribe *Tpcn2*.
