# Supplementary material
Source: PubMed Central journal article supplement (PMC4174929)
Supplement: 493dc6ad857cf36572e3e897e90816f6_genetics.114.162982-6.pdf [file 493dc6ad857cf36572e3e897e90816f6_genetics.114.162982-6.pdf]

**Table S7 Phenotypic differences in *Tpcn2* knock-out, heterozygote and wild-type mice**

| <b>Trait</b>                      | <b>Wild-type (mean <math>\pm</math> SD)</b> | <b>Heterozygotes (mean <math>\pm</math> SD)</b> | <b>Knock-out (mean <math>\pm</math> SD)</b> |
|-----------------------------------|---------------------------------------------|-------------------------------------------------|---------------------------------------------|
| <b>Glucose_AUC</b>                | 22,917.5 $\pm$ 4,384.2                      | 21,811.2 $\pm$ 1,609.2                          | 20,700.0 $\pm$ 3,660.1                      |
| <b>Insulin_AUC</b>                | 165.4 $\pm$ 13.4                            | 147.2 $\pm$ 35.8                                | 126.2 $\pm$ 6.4**                           |
| <b>Fasting glucose (mg/dL)</b>    | 111.0 $\pm$ 12.0                            | 116.3 $\pm$ 15.5                                | 96.2 $\pm$ 9.6*                             |
| <b>Fasting insulin (ng/ml)</b>    | 1.04 $\pm$ 0.22                             | 1.03 $\pm$ 0.51                                 | 0.80 $\pm$ 0.25                             |
| <b>QUICKI (1/(logI0 + logG0))</b> | 0.49 $\pm$ 0.02                             | 0.49 $\pm$ 0.04                                 | 0.54 $\pm$ 0.04                             |
| <b>Body Weight (g)</b>            | 25.3 $\pm$ 2.1                              | 24.3 $\pm$ 2.4                                  | 27.0 $\pm$ 3.6                              |

\*\*p = 0.031 (wild-type mice differ from knock-out mice based on a Tukey-post-hoc based after an ANOVA between all three genotypes), \*p = 0.048 (t-test between wild-type and knock-out mice only)
